# **A polygenic architecture with conditionally neutral effects underlies ecological differentiation in *Silene***

Susanne Gramlich<sup>1</sup>, Xiaodong Liu<sup>1,2</sup>, Adrien Favre<sup>3</sup>, C. Alex Buerkle<sup>4</sup> and Sophie Karrenberg<sup>1\*</sup>

<sup>1</sup> Department of Ecology and Genetics, Uppsala University, Norbyvägen 18D, 75267 Uppsala, Sweden

<sup>2</sup>The Bioinformatics Center, Department of Biology, University of Copenhagen, Ole Maaløes Vej 5, 2200, Copenhagen, Denmark

<sup>3</sup> Senckenberg Research Institute and Natural History Museum, Senckenberganlage 25, 60325 Frankfurt/Main, Germany

<sup>4</sup> Department of Botany, University of Wyoming, 1000 E. University Ave. Laramie, WY82071, USA

\* corresponding author: Sophie Karrenberg, [sophie.karrenberg@ebc.uu.se](mailto:sophie.karrenberg@ebc.uu.se), +46 (0)76 820 7578

## **Word count**

Summary: 196 words

Total (main text): 5569 words

Introduction: 933 words

Materials and Methods: 1820 words

Results: 1026 words

Discussion: 1679 words

Acknowledgements: 111

**Number of Figures:** 5 (all in color)

**Number of Tables:** 1

**Number Supporting Information files:** 2 (Figures S1-S8, Tables S1-S4)

## 30 **Summary**

- 31 • Ecological differentiation can drive speciation but it is unclear how the genetic  
32 architecture of habitat-dependent fitness contributes to lineage divergence. We  
33 investigated the genetic architecture of cumulative flowering, a fitness  
34 component, in second-generation hybrids between *Silene dioica* and *S. latifolia*  
35 transplanted into the natural habitat of each species.
- 36 • We used reduced-representation sequencing and Bayesian Sparse Linear Mixed  
37 Models (BSLMMs) to analyze the genetic control of cumulative flowering in  
38 each habitat.
- 39 • Our results point to a polygenic architecture of cumulative flowering. Allelic  
40 effects were mostly beneficial or deleterious in one habitat and neutral in the  
41 other. The direction of allelic effects was associated with allele frequency  
42 differences between the species: positive-effect alleles were often derived from  
43 the native species, whereas negative-effect alleles, at other loci, tended to  
44 originate from the non-native species.
- 45 • We conclude that ecological differentiation is governed and maintained by many  
46 loci with small, conditionally neutral effects. Conditional neutrality may result  
47 from differences in selection targets in the two habitats and provides hidden  
48 variation upon which selection can act. Polygenic architectures of adaptive  
49 differentiation are expected to be transient during lineage divergence and may  
50 therefore be unrelated to high genetic differentiation at the underlying loci.

51

52 **Key words:** adaptation, Bayesian Sparse Linear Mixed Models (BSLMM), conditional  
53 neutrality, ddRAD-Seq, reproductive isolation, speciation, *Silene*

## 54 **Introduction**

55 Adaptation to different habitats can promote divergence and speciation and can mediate  
 56 population persistence under changing conditions (Nosil, 2012; Savolainen *et al.*, 2013).  
 57 Evolutionary trajectories toward adaptive differentiation depend on the number and  
 58 effect sizes of loci controlling fitness, on allelic effects of such loci in alternative  
 59 habitats and on gene flow (Savolainen *et al.*, 2013; Tigano & Friesen, 2016; Kokko *et*  
 60 *al.*, 2017). However, despite recent progress in the theoretical understanding of  
 61 adaptation (Yeaman, 2015; Mee & Yeaman, 2019; Booker *et al.*, 2021), empirical  
 62 studies on the genetic control of fitness in natural habitats is still scarce (Wadgymar *et*  
 63 *al.*, 2017). Here we provide such a study using two ecologically differentiated but  
 64 hybridizing champions (*Silene*).

65 Adaptive differentiation is often depicted as a classic cartoon with populations  
 66 outperforming other populations in their home habitat but not in the foreign habitat  
 67 (Kawecki & Ebert, 2004). A similar pattern has been proposed to operate at the genetic  
 68 level: alleles with positive effects on fitness in one habitat have negative effects in the  
 69 alternative habitat, termed antagonistic pleiotropy (Anderson *et al.*, 2011; Savolainen *et*  
 70 *al.*, 2013). Empirical data, however, suggests that such antagonistic pleiotropy is rare in  
 71 natural populations, although this could partially be caused by limited statistical power  
 72 (Anderson *et al.*, 2011; Anderson *et al.*, 2014; Wadgymar *et al.*, 2017). An alternative  
 73 pattern, conditional neutrality, where alleles have neutral effects in one environment and  
 74 are under positive or negative selection in the other, may be much more prevalent  
 75 (Anderson *et al.*, 2011; Savolainen *et al.*, 2013; Wadgymar *et al.*, 2017). In fact, even  
 76 at the phenotypic level, populations often perform differently in one habitat but not in  
 77 the other (Leimu & Fischer, 2008). Importantly, loci with antagonistic pleiotropy for  
 78 fitness in alternative habitats are expected to be maintained by natural selection and  
 79 contribute to population differentiation even with high gene flow, whereas conditionally  
 80 neutral loci can only lead to transient allele frequency differences in high-gene flow  
 81 scenarios (Mitchell-Olds *et al.*, 2007; Savolainen *et al.*, 2013; Tiffin & Ross-Ibarra,  
 82 2014; Mee & Yeaman, 2019; Booker *et al.*, 2021). If adaptive allele frequency changes  
 83 are predominantly transient, even in the presence of consistent selection, prospects will  
 84 be poor for finding loci underlying adaptive differentiation with commonly used  
 85 methods for quantifying and comparing genetic differentiation along the genome (i.e.,  
 86 genome scans of differentiation).

87 A further major determinant of adaptive differentiation concerns the number and effect  
88 sizes of the underlying loci. In general, the distribution of effect sizes for complex traits  
89 (including fitness) is expected to be exponential (Orr, 1998, 2005) such that adaptation  
90 is mainly due to many loci with small effects, while large-effect loci, although not  
91 generally unimportant, are rare (Orr, 1998; Orr, 2005; Rockman, 2012; Savolainen *et al.*,  
92 2013; Boyle *et al.*, 2017; Selby & Willis, 2018). A large number of segregating loci  
93 underlying adaptation further promotes transient genetic architectures of adaptation  
94 (Yeaman & Whitlock, 2011; Yeaman, 2015; Booker *et al.*, 2021). Polygenic or even  
95 omnigenic genetic architectures, involving most of the genome, render identification of  
96 all individual loci both practically impossible and undesirable (Rockman, 2012). As  
97 effect sizes decrease and the number of loci increases, it becomes progressively more  
98 difficult to detect individual genotype-phenotype associations and to distinguish them  
99 from spurious associations due to linkage. For this reason, promising methods, such as  
100 Bayesian Sparse Linear Mixed Models (BSLMMs), identify genotype-phenotype  
101 associations of all loci simultaneously rather than individually, assume polygenic  
102 genetic architectures and remove effects that can be attributed to linkage disequilibrium  
103 (Zhou *et al.*, 2013; Gompert *et al.*, 2017). The approach has been successfully applied  
104 in studies on adaptive divergence, for example in pine (Lind *et al.*, 2017) and in  
105 *Arabidopsis* (Exposito-Alonso *et al.*, 2019).

106 In this study, we investigate the genetic basis of differential adaptation in two dioecious  
107 sister species of *Silene* (Caryophyllaceae), *Silene dioica* (L.) Clairv. and *S. latifolia*  
108 Poiret. Demographic models indicate that the two species diverged with gene flow  
109 within the last 120 000 years reaching a neutral sequence divergence ( $D_a$ , autosomes) of  
110 0.0027 and genetic differentiation,  $F_{ST}$ , of 0.28 (Hu & Filatov, 2015; Liu *et al.*, 2020).  
111 The pink-flowered *S. dioica* occurs in moister and colder habitats like meadows,  
112 pastures or forests and occupies a wide range of elevations up to more than 2300 m a. s.  
113 l., while the white-flowered *S. latifolia* is found on drier, warmer and more disturbed  
114 sites like dry meadows, arable fields or road sites at elevations up to 1000 m a. s. l.  
115 (Friedrich, 1979; Karrenberg & Favre, 2008). Ecological differentiation and assortative  
116 pollination constitute strong barriers to gene flow in this species pair, but the two  
117 species are still fully cross-fertile (Goulson & Jerrim, 1997; Karrenberg *et al.*, 2019).  
118 Studies in an experimental garden point to a complex, genome wide genetic architecture  
119 of traits associated with reproductive isolation, such as flower color, flowering

phenology, first-year flowering and specific leaf area in this system (Liu & Karrenberg, 2018).

Here we investigated the genetic architecture of adaptation using recombinant second-generation hybrids ( $F_2$ ) from a multi-site field transplant experiment where the two species exhibited strong evidence of habitat adaptation: each species outperformed the other in its own habitat in terms of flowering and survival over four years (Fig. 1, Favre *et al.*, 2017). We focused on the following questions: (1) What is the genetic architecture underlying differential habitat adaptation? (2) Is antagonistic pleiotropy or conditional neutrality the predominant pattern when comparing allelic effects across habitats? and (3) Are fitness effects associated with allele frequency differences between the two species; for example, are beneficial alleles more likely to be derived from the native species?

## Materials and Methods

### *Transplant experiment, measurements and sampling*

Second-generation ( $F_2$ ) hybrids between *Silene dioica* (L.) Clairv. and *Silene latifolia* Poir., derived from 36  $F_0$  individuals of three populations of each species, were transplanted as juveniles into four natural sites, two in each species's habitat, as part of a larger experiment with six sites (Favre *et al.*, 2017, Supporting Information Tables S1, S2, and S3). Sites of *S. dioica* were situated at higher altitudes with a colder climate and shorter growing season as compared to the *S. latifolia* sites (Supporting Information Table S1). Leaf samples were collected prior to transplantation and silica-dried and we selected four of the six sites for this study based on availability and quality of leaf samples. Flowering and survival were assessed over four years and cumulative flowering was calculated as the number of times an individual flowered plus 1 if it survived to the end of the experiment, for detailed analyses of survival and flowering see Favre *et al.* (2017). We sampled 4-6  $F_2$  individuals from each of 18  $F_2$  families at each of the four selected sites (298  $F_2$  individuals in total), striving to include both high and low fitness individuals from each family and site. To assess allele frequency in the two species we further included samples of 32  $F_0$  individuals and used existing data for the remaining four  $F_0$  individuals (Liu & Karrenberg, 2018, Supporting Information Table S3).

For illustration purposes (Fig. 1), we re-analyzed cumulative flowering in the two species and their first- and second-generation hybrids for the four sites used here, (18-36 families per cross type, 5-20 individuals per family, 5 blocks per site, Favre *et al.* 2017, Supporting Information Table S2). We used linear mixed models of cumulative flowering in each habitat with cross type as a fixed factor and family and block nested in site as random factors using the *lme4* package (Bates *et al.*, 2015) for R version 4.02 (R Core Team, 2020). We extracted least square means of cumulative flowering and performed multiple comparisons between cross types within sites with Holm correction of P-values in the *emmeans* package (Lenth, 2020). Cumulative flowering was log(Y+1)-transformed to yield normally distributed residuals and improve model fit. Means and standard errors are reported back-transformed to the original scale.

# *DNA extraction and sequencing*

We extracted genomic DNA from silica-dried leaf tissue with Qiagen's DNeasy Plant Mini Kit (Qiagen, Germany) and quantified DNA using a Qubit dsDNA HS fluorometer (Life Technologies, Sweden). Double-digest RAD sequencing (ddRAD-seq) libraries were prepared with EcoRI and TaqI restriction enzymes as described in Liu and Karrenberg (2018). After enzymatic digestion, DNA fragments were ligated with barcoded adaptors and size-selected to approximately 550 bp (Peterson *et al.*, 2012). In total, eight 48-plex libraries were sequenced on an Illumina HiSeq 2500 system at the SNP&SEQ technology platform of SciLifeLab, Uppsala, Sweden using 125-bp paired-end chemistry and two libraries per lane. F<sub>0</sub> individuals were included in 2 libraries to achieve higher coverage.

# *Bioinformatic analysis - processing of raw reads and variant filtering*

The total sequencing output was 1,382,838,294 reads for 298 F<sub>2</sub> individuals (mean with one standard error: 4,656,021 ± 233,639 reads) and 461,127,142 reads for 32 F<sub>0</sub> individuals (mean: 14,410,223 ± 1,093,409 reads); data on the remaining four F<sub>0</sub> individuals (Supplementary Information Table S3) was available from (Liu & Karrenberg, 2018). We processed the ddRAD-sequence reads following the dDocent pipeline (Puritz *et al.*, 2014). After de-multiplexing of raw reads using STACKS 2.0b (Catchen *et al.*, 2013) and trimming with *fastp* (Chen *et al.*, 2018), we used BWA MEM 0.7.17 with default parameters (Li, 2013) to map reads to ddRAD-seq-generated

reference contigs, which were previously assembled from eight deeply sequenced individuals of both species and hybrids and corresponded to 95,040,562 bp in total, corresponding to approximately 3.4% of the *S. latifolia* genome (Liu & Karrenberg, 2018; Liu *et al.*, 2020). Only a partial genome sequence (one third of the 2.8 Gbp genome) with short scaffolds ( $N_{50} = 10,785$  bp) is currently available for *S. latifolia* (Krasovec *et al.*, 2018).

Variants were called with FreeBayes 1.1.0 (Garrison & Marth, 2012) without population priors using the following parameters: minimum mapping quality 30, minimum base quality 20, maximum complex gap 3, minimum repeat entropy 1, binominal-obs-priors 1, and use-best-n-alleles 10. Variants were filtered following O'Leary *et al.* (2018): First, VCFtools 0.1.15 (Danecek *et al.*, 2011) was used to retain SNP sites with a minimum depth of 3, quality of 30, mean depth of 10 and allele count of 3. Secondly, we used *Vcfilter* implemented in vcflib/2017-04-04 (<https://github.com/vcflib/vcflib>) to retain sites with an allele balance either between 0.25 and 0.75 or lower than 0.01, a quality/depth ratio of  $> 0.25$ , and a mapping quality ratio between 0.9 and 1.05. We further used *Vcfilter* to remove loci with differences in read pairing between the alleles or with or excessive read depths (parameters as suggested in O'Leary *et al.*, 2018). We reduced the dataset to bi-allelic sites and removed 6  $F_2$  individuals with more than 99% missing data. SNPs in perfect linkage disequilibrium ( $r^2 = 1$ ) within the  $F_2$  individuals were removed using PLINK 1.9 (Purcell *et al.*, 2007, <http://pngu.mgh.harvard.edu/purcell/plink/>). The filtered dataset contained 290  $F_2$  individuals (*S. dioica*-habitat: 134, *S. latifolia*-habitat: 156) and 89,524 loci. Of these, 42,090 loci with both alleles in both habitats and genotypes for more than 95  $F_2$  individuals in each habitat were used for further analyses. These loci had an average read depth of  $15.02 \pm 0.03$  (median 13.83) for the  $F_2$  individuals,  $36.85 \pm 0.08$  (median: 33.09) for the 32  $F_0$  individuals sequenced in this study and  $41.39 \pm 0.17$  (median: 36.25) for the 4  $F_0$  individuals from Liu and Karrenberg (2018). We used genotype probabilities ranging from 0 to 2, calculated from genotype likelihoods ([https://github.com/visoca/popgenomworkshop-gwas\\_gemma/tree/master/scripts/bcf2bbgeno.pl](https://github.com/visoca/popgenomworkshop-gwas_gemma/tree/master/scripts/bcf2bbgeno.pl), accessed 28 January 2019), rather than called genotypes (Nielsen *et al.*, 2011). Genotype probabilities of 0 and 2 denote homozygosity for the reference and alternative allele, respectively, while 1 indicates heterozygosity.



## 215 *Genetic structure*

216 We checked for genetic structure in the F<sub>2</sub> individuals using Principal Components  
217 Analysis (PCA) with the *ade4* package (Dray and Dufour, 2007), based on genotype  
218 probabilities. For this analysis we reduced the dataset to 220 SNP loci with data  
219 available in all 290 F<sub>2</sub> individuals used in the genetic association analysis. Results did  
220 not differ from analyses on more or all loci with missing values replaced by average  
221 genotype probabilities.

## 222 *Genetic association analysis*

223 We used Bayesian Sparse Linear Mixed Models (BSLMM) in GEMMA 0.98.1 (Zhou  
224 *et al.*, 2013) to investigate the genetic architecture of cumulative flowering. BSLMMs  
225 are a combination of linear mixed models, which assume that every variant has an  
226 effect, and Bayesian Variable Selection Regression, which assumes that only a small  
227 proportion of the variants has an effect (Zhou *et al.*, 2013). BSLMM analyses were  
228 performed separately for each habitat using cumulative flowering values standardized  
229 within sites and genotype probabilities. A centered relatedness matrix was used as a  
230 covariate to take account of the family structure and the wide cross, according to the  
231 standard BSLMM method implemented in GEMMA (Zhou *et al.*, 2013).

232 We characterized genetic architectures using estimates of the following  
233 hyperparameters: the proportion of phenotypic variance explained by all SNPs in the  
234 model (*PVE*), the proportion of *PVE* explained by SNPs with nonzero effects (*PGE*),  
235 and the number of SNPs with a measurable effect on the phenotype ( $n\gamma$ ). In studies  
236 with incomplete genome coverage such as this one, *PVE* can be interpreted as broad  
237 sense heritability  $H^2$ , whereas the product of *PVE* and *PGE* can be interpreted as  
238 narrow-sense heritability  $h^2$  (Zhou *et al.*, 2013; Gompert *et al.*, 2017; Bresadola *et al.*,  
239 2019). For each SNP locus, we estimated the posterior inclusion probability (*PIP*, the  
240 proportion of iterations in which a SNP had a nonzero effect on phenotypic variation)  
241 and the effect size of the alternative allele on cumulative flowering. We report both raw  
242 effect estimates ( $\hat{\beta}$ ), the effect of a locus on the phenotype when it is included in the  
243 model, and model-averaged effect estimates ( $\bar{\beta}$ ) that take into account the posterior  
244 inclusion probability of a locus in the models (Zhou *et al.*, 2013; Gompert *et al.*, 2017).  
245 BSLMMs were run five times with 10,000,000 burn-in steps and 40,000,000 iterations  
246 with a thinning interval of 10. Convergence of the five runs was checked graphically.



Hyperparameters were estimated after combining posterior distributions across runs;  $PIP$ ,  $\hat{\beta}$  and  $\bar{\beta}$  (per locus) were averaged across runs. A threshold of  $PIP > 0.01$  was used to identify SNPs with sparse effects (Gompert *et al.*, 2013; Comeault *et al.*, 2014).

# *Allelic effects and allele frequencies*

We graphically evaluated whether alleles have universal effects or display antagonistic pleiotropy or conditional neutrality by plotting per-locus effect sizes ( $\hat{\beta}$  and  $\bar{\beta}$ ) in the *S. dioica* habitat against effect sizes in the *S. latifolia* habitat. Note that  $\beta$ -values reflect effect estimates of the alternative allele replacing the reference allele. The *de novo* ddRADseq reference sequences used here contain alleles derived from both species (Liu & Karrenberg, 2018; Liu *et al.*, 2020) and do not inform on allelic origin.

To analyze whether allelic origin is associated with fitness effects, we calculated the frequency of the alternative allele ( $AF_{alt}$ ) in the 18  $F_0$  individuals of each species (Tables S2 and S3) for loci that had genotypes for  $> 12$   $F_0$  individuals per species at individual read depths of at least 6 (36,161 loci). For each SNP locus, we expressed  $AF_{alt}$  as the average genotype probability per species divided by 2. We further estimated the allele frequency difference between species ( $AFD_{alt}$ ) as  $AF_{alt}(S. dioica) - AF_{alt}(S. latifolia)$ .  $AFD_{alt}$  values thus range from -1 (alternative allele fixed in *S. latifolia*  $F_0$  individuals, and reference allele fixed in *S. dioica*  $F_0$  individuals) to 1 (alternative allele fixed in *S. dioica*  $F_0$  individuals, and reference allele fixed in *S. latifolia*  $F_0$  individuals). We tested whether  $AFD_{alt}$  differs between loci with positive and negative effects on cumulative flowering in each habitat using a general permutation test in the R package *coin* (Hothorn *et al.*, 2008).

# *Method validation*

We assessed the power of BSLMMs to detect genotype - phenotype associations in our data using a simulation approach similar to that in Gompert *et al.* (2017). Phenotypes were simulated on the basis of the observed genetic data in 290 individuals for four combinations of heritability ( $h^2 = 0.2$  or  $h^2 = 0.05$ ) and number of functional variants ( $N = 10$  or  $N = 50$ ). We simulated a normally distributed trait for which nine individuals of each family were randomly drawn. We reduced the simulated dataset to 150 individuals at random to match the sample size in our data. For each combination of  $h^2$  and  $n$  30 sets of simulated phenotypes were used as input for BSLMMs with

10,000,000 burn-in steps and 40,000,000 iterations. For each simulation, *PVE*, *PGE* and  $n\text{-}\gamma$  were estimated as well as the correlation between the simulated effect size and effect size estimates ( $\hat{\beta}$  and  $\bar{\beta}$ ).

## Results

### *Cumulative flowering and genetic structure*

Each species outperformed the other in its own habitat and performed best in its habitat in terms of cumulative flowering, providing strong evidence for habitat adaptation (Fig. 1, Favre *et al.*, 2017).  $F_1$  hybrids were intermediate for cumulative flowering and  $F_2$  hybrids flowered less often than  $F_1$  hybrids on average (Fig. 1, Favre *et al.*, 2017).

The  $F_2$  families exhibited extensive genetic variation in the PCA, with clustering of individuals within families but without any other emerging patterns (Supplementary Information Figs. S1 and S2). For most loci, the alternative allele occurred at low frequency in one or both species, but all combinations of allele frequencies between species were found in the data, including loci with high differentiation where the alternative allele was at high frequency in one species and at the same time near absent from the other species (Fig. 2).

### *Association analysis*

The proportion of phenotypic variation explained (*PVE*) by BSLMMs was 0.12 and 0.10 for the *S. dioica* and the *S. latifolia* habitat, respectively (medians of posterior distributions, Table 1, posterior distributions are shown in the Supporting Information Figs. S3 and S4). Less than half of the *PVE* could be attributed to sparse effects, leading to estimates of narrow-sense heritability ( $h^2$ ;  $PGE \times PVE$ ) of 0.05 and 0.03 for the *S. dioica* and *S. latifolia* habitat (Table 1). The number of loci with non-zero effects ( $n\text{-}\gamma$ ) was estimated to be 11 in the *S. dioica* habitat and 16 in the *S. latifolia* habitat (Table 1). Median *PIP* for individual SNPs was 0.001 in both habitats and we detected 3 loci with  $PIP > 0.01$ , one in the *S. dioica* habitat and two in the *S. latifolia* habitat (Supporting information Table S4). *PIP* for individual SNPs could not be summed over genomic windows because no continuous reference genome is available (Krasovec *et*

307 *al.*, 2018) and we used a ddRADseq-generated *de novo* reference in this study (Liu &  
308 Karrenberg, 2018; Liu *et al.*, 2020).

309

# 310 *Allele specific effects in alternative habitats and origin of alleles*

311 Raw effect size estimates  $\hat{\beta}$  for cumulative flowering (in units of standard deviations,  
312 i.e., z-scores) ranged from -0.57 to 0.28 in the *S. dioica* habitat and from -0.52 to 0.34 in  
313 the *S. latifolia* habitat. Positive or negative allelic effects in one habitat ( $\hat{\beta} \gg 0$  or  $\hat{\beta} \ll$   
314 0) were associated with very low  $\hat{\beta}$  values ( $\hat{\beta} \approx 0$ ) in the other habitat, consistent with  
315 conditional neutrality (Fig. 3, cross pattern). A single locus showed opposing effects in  
316 the two habitats,  $\hat{\beta} \ll 0$  in the *S. dioica* habitat and  $\hat{\beta} \gg 0$  in the *S. latifolia* habitat,  
317 suggestive of antagonistic pleiotropy (Fig. 3). Analyses for model-averaged effect  
318 sizes,  $\bar{\beta}$ , exhibited a very similar pattern (Supporting information Fig. S5), but with  
319 much smaller values due to multiplication with low posterior inclusion probabilities.

320 A striking pattern in our data is that alleles with effects on cumulative flowering were  
321 significantly associated with higher allele frequencies in  $F_0$  individuals of the native  
322 species whereas alleles with negative effects on cumulative flowering were significantly  
323 more likely to be derived from the non-native species (Fig. 3, Supporting Information  
324 Figs. S5, S6 and S7). In the *S. dioica* habitat, loci with positive effects of the alternative  
325 allele on cumulative flowering had a positive median  $AFD_{alt}$  (alternative allele more  
326 common in *S. dioica*, red on Fig. 3), that were significantly different from the negative  
327 median  $AFD_{alt}$  (alternative allele more common in *S. latifolia*, blue on Fig. 3) at  
328 negative-effect alleles (Supporting Information Figs. S6 and S7). In the *S. latifolia*  
329 habitat, we observed the reverse pattern: loci with positive effects had negative median  
330  $AFD_{alt}$  values that differed significantly from the positive median  $AFD_{alt}$  values for  
331 negative-effect loci (Supporting information Figs. S6 and S7). These patterns were  
332 observed for both  $\hat{\beta}$  and  $\bar{\beta}$ , when using a subset of the approximately 0.5 % loci with  
333 strongest effect sizes (absolute values of  $\hat{\beta}$  over 0.1 and absolute values of  $\bar{\beta}$  over  
334 0.003) and when using all loci (i.e., negative-effect loci with  $\hat{\beta}$  or  $\bar{\beta} > 0$  and positive-  
335 effect loci with  $\hat{\beta}$  or  $\bar{\beta} < 0$ , Supporting Information Figs. S6 and S7).

Alleles with positive effects on cumulative flowering in each habitat ( $\hat{\beta} > 0.1$ ) were rare in the foreign species but at appreciable frequencies in the native species; this effect was stronger in the *S. latifolia* habitat than in the *S. dioica* habitat (Fig. 4). Loci with negative effects ( $\hat{\beta} < -0.1$ ), in contrast, were rare in the native species but at moderate or high frequencies in the foreign species (Fig. 4). These allele frequency patterns across species differ strongly from the overall allele joint allele frequency pattern for all loci (Fig. 2c).

### Method validation

BSLMM estimates of narrow-sense heritability ( $h^2$ ) in simulated datasets responded to changes in simulated heritabilities, as expected (Fig. 5). BSLMMs on simulated data with a low  $h^2$  of 0.05 recovered  $h^2$  estimates in the correct range, while models on simulated data with a high  $h^2$  of 0.2 yielded lower than expected  $h^2$  estimates, especially when the number of sparse-effect loci was high ( $N = 50$ , Fig. 5). The number of sparse-effect loci was correctly estimated for simulated datasets with few loci ( $N = 10$ ), but strongly underestimated when the simulated number of loci was high (Fig. 5). Correlations of simulated and estimated  $\hat{\beta}$  and  $\bar{\beta}$ -values were highest for datasets with high simulated heritabilities and declined for datasets with lower heritability and a higher number of functional loci (Fig. 5, Supporting Information Fig. S8). In simulations with  $h^2 = 0.02$ ,  $\hat{\beta}$  exhibited higher correlations with simulated effects sizes than  $\bar{\beta}$  (Supporting Information Fig. S8).

These simulations thus show that our analyses can recover heritabilities and general patterns in effect size, however, estimates of the number of sparse effect loci ( $n-\gamma$ ) must be treated with great caution. The consistency between estimated and simulated  $h^2$  for datasets with low simulated  $h^2$  shows that the low  $h^2$  on our empirical data are reliable, especially as such low  $h^2$  estimates were very rare in the high  $h^2$  simulations. We expect that the apparent underestimation of  $n-\gamma$  also decreases posterior inclusion probabilities and thus  $\bar{\beta}$ .

## Discussion

Our results suggest that ecological differentiation between the champions *Silene dioica* and *S. latifolia* has a polygenic architecture, based on a reciprocal transplant experiment

with recombinant second-generation hybrids between the two species. Many alleles had small effects on cumulative flowering, a fitness component, but only in one of the two habitats, conforming to a conditional neutrality pattern. Despite small effect sizes, the direction of allelic effects was consistent with selection for native alleles and against non-native alleles. This suggests that habitat adaptation is maintained by species-specific variants and that habitat dependent selection on hybrids reduces the inflow of non-native alleles. Below we discuss the implications of these findings for lineage divergence as well as the advantages and limitations of our approach.

#### *Low heritability of a fitness component in the field, based on many small-effect loci*

Heritability of cumulative flowering, a fitness component, was low to moderate in  $F_2$  hybrids between *S. dioica* and *S. latifolia* in the habitats of both species. Using Bayesian Sparse Linear Mixed Models (BSLMM) we estimated narrow-sense heritability  $h^2$  ( $PVE \times PGE$ ) to be 0.04 and 0.03 and broad-sense heritability  $H^2$  ( $PVE$ ) to be 0.12 and 0.10 for *S. dioica* and *S. latifolia* habitats, respectively. Our simulations indicate that such low  $h^2$  values can be recovered fairly well with BSLMM analyses, as also reported by Gompert *et al.* (2017). Similar low to moderate heritabilities have previously been found for complex traits, for example for height in *Pinus albicaulis* (Lind *et al.*, 2017) and in *Populus* (Bresadola *et al.*, 2019) as well as in *Arabidopsis thaliana* accessions, where heritability for fitness components varied strongly between experimental sites (Exposito-Alonso *et al.*, 2019). Our analyses suggest a polygenic genetic architecture of cumulative flowering in *Silene* with estimates of the number of sparse-effect loci estimated to 11 in the *S. dioica* habitat and to 16 in the *S. latifolia* habitat; however, our simulations indicate that the number of sparse effect loci in our dataset is difficult to estimate with BSLMM analyses, similar to results from Gompert *et al.* (2017). In many other systems, oligo- or polygenic control of fitness components was detected in natural settings, especially when the number of contributing loci was explicitly modelled (Lind *et al.*, 2017; Bresadola *et al.*, 2019; Exposito-Alonso *et al.*, 2019). A polygenic genetic architecture of fitness components in our study system does appear likely given that QTL studies detected many loci distributed throughout the genome that were associated with ecologically relevant traits (Liu & Karrenberg, 2018; Baena-Díaz *et al.*, 2019).

Limitations of studies on the genetic architecture of fitness in natural habitats include the number of individuals and sites that can be studied as well as the genetic resolution in the experimental material. Where markers are used, as in our study, most associations will be the result of linkage to causal variants rather than due to causal variants themselves. This reduces estimates of effect sizes and may lead to a situation where multiple loci linked to the same causal variant are included in alternative BSLMM iterations reducing the posterior inclusion probability (*PIP*) of each linked locus (Bresadola *et al.*, 2019). We used a highly variable multi-cross  $F_2$  population with a limited number of recombination events, where markers likely were associated with larger genomic regions derived from each species. Recombination and genetic variation included in our material differs markedly from other studies using largely homozygous selfing accessions (*Arabidopsis*, Exposito-Alonso *et al.*, 2019), within-species crosses or recombinant inbred lines derived from a small number of individuals (*Arabidopsis*, Fournier-Level *et al.*, 2013; Leinonen *et al.*, 2013; Ågren *et al.*, 2017) or naturally recombinant wild-collected hybrids (*Populus*, Bresadola *et al.*, 2019). These differences can make it difficult to compare results and model performance across studies. Despite its limitations, our setup has the advantage that the multi-cross  $F_2$  population used here approximates a natural contact site situation, where early-generation hybrids grow in the habitats of the two species when they come into contact (Karrenberg & Favre, 2008).

# *Conditional neutrality is the prevailing pattern*

Allelic effects conformed to a conditional neutrality pattern in our study: both positive and negative allelic effects on cumulative flowering in one habitat were associated with near-zero effects in the other habitat; only one locus deviated from this pattern. This finding further strengthens the view that conditional neutrality is more common in natural settings than antagonistic pleiotropy, as has been shown in monkeyflowers (Hall *et al.*, 2010) and *Arabidopsis* (Fournier-Level *et al.*, 2013; Ågren *et al.*, 2017; Exposito-Alonso *et al.*, 2019), switchgrass (Lowry *et al.*, 2019) and *Lycaeides* butterflies (Gompert *et al.*, 2015). However, strong evidence for conditional neutrality is generally difficult to provide, because this would require evidence for the absence of an effect in one of the habitats (Anderson *et al.*, 2014; Mee & Yeaman, 2019). Interestingly, antagonistic pleiotropy appears to be detected more readily in controlled experimental evolution studies with microorganisms than in natural settings with higher plants or

insects (Gompert & Messina, 2016; Bono *et al.*, 2017; Wadgymar *et al.*, 2017; Tusso *et al.*, 2021). This is likely due to the control of selective agents in experiments as opposed to natural sites where both selective agents and traits under selection may vary (Wadgymar *et al.*, 2017). In our system, high-elevation sites of *S. dioica* exhibit high winter mortality in *S. latifolia* and in hybrids in comparison to *S. dioica* (Favre *et al.*, 2017) suggesting that frost tolerance or the regulation of carbohydrate storage could be under selection. At lowland *S. latifolia* sites, in contrast, *S. dioica* and hybrids suffer higher summer mortality than the native *S. latifolia*, most likely due to drought exposure (Favre *et al.*, 2017). We therefore find it plausible that phenotypic and genetic targets of selection differ between habitats and this can contribute to the conditional neutrality pattern of effect sizes for fitness components as observed here.

*Fitness is increased by native alleles and decreased by non-native alleles, but not at the same loci*

A striking result in our study is the association of allele frequencies in the two species with allelic effects on cumulative flowering, even for loci with very small effects. Alleles with positive effects were rare in the non-native species and common or of intermediate frequency in the native species, especially in the *S. latifolia* habitat. Alleles with positive effects on cumulative flowering in one habitat were neutral in the alternative habitat and could thus easily spread through both species if not lost by drift (Savolainen *et al.*, 2013; Mee & Yeaman, 2019). Alleles with negative effects on cumulative flowering, on the other hand, had intermediate to high frequencies in the non-native species but were rare in the native species. Negative-effect alleles also included numerous variants that were rare in both species but these loci are most likely linked to causal loci with unknown allele frequencies rather than being causal loci themselves. Negative-effect alleles are most readily interpreted as deleterious load that is only exposed to selection in the alternative habitat and rare, conditionally deleterious variants are expected to arise frequently (Orr, 2005). Conditionally deleterious loci may experience reduced gene flow due to negative selection in the alternative habitat and thereby increase between-lineage differentiation (Mee & Yeaman, 2019). However, rare variants with conditionally deleterious effects likely remain rare even in the lineage they arose in and will thus not exhibit high differentiation between lineages. Variants with conditionally neutral effects, as reported here, likely play an important role for adaptation, but they are most certainly under-reported, not only because many of these



463 variants are rare, but also because studies in alternative and relevant environments are  
464 needed to detect them.

# 465 *Implications for hybrid zones and speciation*

466 Our results suggest that selection favors hybrids that are genetically similar to the native  
467 species. In early-generation hybrids with still large genomic regions of each species, as  
468 in our experiment, selection will favor genomic regions that contain positive-effect  
469 alleles that were more often derived from the native species. At the same time,  
470 selection will disfavor regions with negative-effect alleles that were often derived from  
471 the non-native species. Both types of conditionally neutral variants thus act as barriers  
472 to gene flow in each habitat. In natural hybrid zones between *S. dioica* and *S. latifolia*,  
473 intermediate individuals are rare and later-generation hybrids are heavily biased toward  
474 individuals that are genetically similar to the native species (Minder *et al.*, 2007;  
475 Karrenberg & Favre, 2008). Our study suggests that this may be due not only to back-  
476 crossing with the native species but also to ecological selection in each habitat.

477 Regarding the evolution of adaptative differentiation, our results suggest adaptation  
478 through selection on many loci in each species. Alleles with small positive effects had  
479 intermediate to high frequencies in the native species and low frequencies in the non-  
480 native species. This may point to a redundant genetic control of adaptation as also  
481 suggested by a QTL study under controlled conditions in our study system (Liu &  
482 Karrenberg, 2018) and by studies in other systems, for example in *Drosophila* (Barghi  
483 *et al.*, 2019). Polygenic architectures of adaptation with redundant effects are expected  
484 to be transient in time (Yeaman & Whitlock, 2011; Yeaman, 2015). Thus, even when  
485 ecological differentiation is a likely driver of divergence, as in our study system  
486 (Goulson & Jerrim, 1997; Karrenberg & Favre, 2008; Karrenberg *et al.*, 2019), this may  
487 not necessarily manifest in strong, range-wide genetic differentiation at the underlying  
488 loci.

# 489 *Conclusion*

490 Overall, our study adds to the understanding of how ecological differentiation can  
491 promote reproductive isolation and lineage divergence. We detected a polygenic  
492 architecture for a fitness component, cumulative flowering, in the champions *Silene*  
493 *dioica* and *S. latifolia* using a reciprocal transplant experiment. Allelic effects were

494 mostly beneficial or deleterious in one habitat and neutral in the other and native-  
 495 derived alleles were favored. Conditionally neutral effects may result from differences  
 496 in selection targets in the two habitat types. Variants with conditionally neutral effects  
 497 provide hidden variation upon which selection can act and facilitate current and future  
 498 adaptation. The challenges ahead lie in understanding how within-lineage variation for  
 499 fitness affecting alleles can be reconciled with the evolution of genome-wide  
 500 differentiation between species.

501

## 502 **Acknowledgements**

503 We thank to Rasmus Janson and Karin Steffen for providing help in the molecular lab.  
 504 We are grateful for support from the Science for Life Laboratory (SciLifeLab) and the  
 505 National Genomics Infrastructure, NGI, for massive parallel sequencing. Computations  
 506 were performed on resources provided by SNIC through the Uppsala Multidisciplinary  
 507 Center for Advanced Computational Science (UPPMAX) under SNIC projects 2017/7-  
 508 406 and 2019/8-21. This work was funded by a project grants of the Swiss National  
 509 Science Foundation (SNF, no. 3100A-118221), the Swedish Research Council  
 510 (Vetenskapsrådet, no. 2012-03622) and the Carl Tryggers foundation to SK, as well as  
 511 by a grant of the German Science Foundation (Deutsche Forschungsgemeinschaft,  
 512 project no. FA1117/1-2) to AF.

## 513 **Author contribution**

514 The study was designed by SK with input by AF and XL. AF conducted the transplant  
 515 experiment with help from SK, XL performed molecular lab work, XL and SG did  
 516 bioinformatic analyses, SG performed the association analysis and simulations with  
 517 help from AB and SK. SK analyzed phenotypes and produced figures with help from  
 518 SG. SK and SG wrote the paper with input from all other authors.

## 519 **Data availability**

520 Double-digest RAD (ddRAD) sequencing data is available on NCBI's Short Read  
 521 Archive (SRA, SUB8324195 <https://www.ncbi.nlm.nih.gov/sra/PRJNA669447>). The

variant call format (VCF) file as well as GEMMA input files will be submitted to dryad  
(project number to be added).

## References

- Ågren J, Oakley CG, Lundemo S, Schemske DW. 2017.** Adaptive divergence in flowering time among natural populations of *Arabidopsis thaliana*: Estimates of selection and QTL mapping. *Evolution* **71**(3): 550-564.
- Anderson JT, Lee CR, Mitchell-Olds T. 2014.** Strong selection genome-wide enhances fitness trade-offs across environments and episodes of selection. *Evolution* **68**(1): 16-31.
- Anderson JT, Willis JH, Mitchell-Olds T. 2011.** Evolutionary genetics of plant adaptation. *Trends in Genetics* **27**(7): 258-266.
- Baena-Díaz F, Zemp N, Widmer A. 2019.** Insights into the genetic architecture of sexual dimorphism from an interspecific cross between two diverging *Silene* (Caryophyllaceae) species. *Molecular Ecology* **28**(23): 5052-5067.
- Barghi N, Tobler R, Nolte V, Jaksic AM, Mallard F, Otte KA, Dolezal M, Taus T, Kofler R, Schlotterer C. 2019.** Genetic redundancy fuels polygenic adaptation in *Drosophila*. *PLoS Biology* **17**(2): e3000128.
- Bates D, Maechler M, Bolker B, Walker S. 2015.** Fitting linear mixed-effects models using *lme4*. *Journal of Statistical Software* **67**: 1-48.
- Bono LM, Smith LB, Jr., Pfennig DW, Burch CL. 2017.** The emergence of performance trade-offs during local adaptation: insights from experimental evolution. *Molecular Ecology* **26**(7): 1720-1733.
- Booker TR, Yeaman S, Whitlock MC. 2021.** Global adaptation complicates the interpretation of genome scans for local adaptation. *Evolution Letters* **5**(1): 4-15.
- Boyle EA, Li YI, Pritchard JK. 2017.** An Expanded View of Complex Traits: From Polygenic to Omnigenic. *Cell* **169**(7): 1177-1186.
- Bresadola L, Caseys C, Castiglione S, Buerkle CA, Wegmann D, Lexer C. 2019.** Admixture mapping in interspecific *Populus* hybrids identifies classes of genomic architectures for phytochemical, morphological and growth traits. *New Phytologist* **223**(4): 2076-2089.
- Catchen J, Hohenlohe PA, Bassham S, Amores A, Cresko WA. 2013.** Stacks: an analysis tool set for population genomics. *Molecular Ecology* **22**: 3124-3140.

554 **Chen S, Zhou Y, Chen Y, Gu J. 2018.** Fastp: An ultra-fast all-in-one FASTQ  
555 preprocessor. *Bioinformatics* **34**(17): i884-i890.

556 **Comeault AA, Soria-Carrasco V, Gompert Z, Farkas TE, Buerkle CA, Parchman**  
557 **TL, Nosil P. 2014.** Genome-wide association mapping of phenotypic traits  
558 subject to a range of intensities of natural selection in *Timema cristinae*. *The*  
559 *American Naturalist* **183**(5): 711-727.

560 **Danecek P, Auton A, Abecasis G, Albers CA, Banks E, DePristo MA, Handsaker**  
561 **RE, Lunter G, Marth GT, Sherry ST, et al. 2011.** The variant call format and  
562 VCFtools. *Bioinformatics* **27**(15): 2156-2158.

563 **Exposito-Alonso M, Burbano HA, Bossdorf O, Nielsen R, Weigel D. 2019.** Natural  
564 selection on the *Arabidopsis thaliana* genome in present and future climates.  
565 *Nature* **573**(7772): 126-129.

566 **Favre A, Widmer A, Karrenberg S. 2017.** Differential adaptation drives ecological  
567 speciation in champions (*Silene*): evidence from a multi-site transplant  
568 experiment. *New Phytologist* **213**(3): 1487-1499.

569 **Fournier-Level A, Wilczek AM, Cooper MD, Roe JL, Anderson J, Eaton D,**  
570 **Moyers BT, Petipas RH, Schaeffer RN, Pieper B, et al. 2013.** Paths to  
571 selection on life history loci in different natural environments across the native  
572 range of *Arabidopsis thaliana*. *Molecular Ecology* **22**(13): 3552-3566.

573 **Friedrich HC 1979.** Caryophyllaceae. In: Rechinger KH ed. *Illustrierte Flora von*  
574 *Mitteleuropa*. Hamburg: Parey.

575 **Garrison E, Marth G. 2012.** Haplotype-based variant detection from short-read  
576 sequencing. 1-9.

577 **Gompert Z, Egan SP, Barrett RD, Feder JL, Nosil P. 2017.** Multilocus approaches  
578 for the measurement of selection on correlated genetic loci. *Molecular Ecology*  
579 **26**(1): 365-382.

580 **Gompert Z, Jahner JP, Scholl CF, Wilson JS, Lucas LK, Soria-Carrasco V,**  
581 **Fordyce JA, Nice CC, Buerkle CA, Forister ML. 2015.** The evolution of  
582 novel host use is unlikely to be constrained by trade-offs or a lack of genetic  
583 variation. *Molecular Ecology* **24**(11): 2777-2793.

584 **Gompert Z, Lucas LK, Nice CC, Buerkle CA. 2013.** Genome divergence and the  
585 genetic architecture of barriers to gene flow between *Lycaeides idas* and  
586 *L.melissa*. *Evolution* **67**(9): 2498-2514.

587 **Gompert Z, Messina FJ. 2016.** Genomic evidence that resource-based trade-offs limit  
588 host-range expansion in a seed beetle. *Evolution* **70**(6): 1249-1264.

589 **Goulson D, Jerrim K. 1997.** Maintenance of the species boundary between *Silene*  
590 *dioica* and *S. latifolia* (red and white campion). *Oikos* **79**(1): 115-126.

591 **Hall MC, Lowry DB, Willis JH. 2010.** Is local adaptation in *Mimulus guttatus* caused  
592 by trade-offs at individual loci? *Molecular Ecology* **19**(13): 2739-2753.

593 **Hothorn T, Hornik K, van de Wiel MA, Zeileis A. 2008.** Implementing a class of  
594 permutation tests: the *coin* package. *Journal of Statistical Software* **28**(8): 1-23.

595 **Hu XS, Filatov DA. 2015.** The large-X effect in plants: Increased species divergence  
596 and reduced gene flow on the *Silene* X-chromosome. *Molecular Ecology* **25**:  
597 2609-2619.

598 **Karrenberg S, Favre A. 2008.** Genetic and ecological differentiation in the hybridizing  
599 champions *Silene dioica* and *S. latifolia*. *Evolution* **62**(4): 763-773.

600 **Karrenberg S, Liu X, Hallander E, Favre A, Herforth Rahmé J, Widmer A. 2019.**  
601 Ecological divergence plays an important role in strong but complex  
602 reproductive isolation in champions (*Silene*). *Evolution* **73**(2): 245-261.

603 **Kawecki TJ, Ebert D. 2004.** Conceptual issues in local adaptation. *Ecology Letters*  
604 **7**(12): 1225-1241.

605 **Kokko H, Chaturvedi A, Croll D, Fischer MC, Guillaume F, Karrenberg S, Kerr**  
606 **B, Rolshausen G, Stapley J. 2017.** Can evolution supply what ecology  
607 demands? *Trends in Ecology and Evolution* **32**(3): 187-197.

608 **Krasovec M, Chester M, Ridout K, Filatov DA. 2018.** The mutation rate and the age  
609 of the sex chromosomes in *Silene latifolia*. *Current Biology* **28**(11): 1832-1838.

610 **Leimu R, Fischer M. 2008.** A meta-analysis of local adaptation in plants. *PloS One*  
611 **3**(12): e4010. doi:4010.1371/journal.pone.0004010.

612 **Leinonen PH, Remington DL, Leppälä J, Savolainen O. 2013.** Genetic basis of local  
613 adaptation and flowering time variation in *Arabidopsis lyrata*. *Molecular*  
614 *Ecology* **22**(3): 709-723.

615 **Lenth RV 2020.** *emmeans*: Estimated marginal means, aka least-squares means. R  
616 package version 1.5.3. <https://CRAN.R-project.org/package=emmeans>.

617 **Li H. 2013.** Aligning sequence reads, clone sequences and assembly contigs with  
618 BWA-MEM. *arXiv* **1303.3997**.

619 **Lind BM, Friedline CJ, Wegrzyn JL, Maloney PE, Vogler DR, Neale DB, Eckert**  
620 **AJ. 2017.** Water availability drives signatures of local adaptation in whitebark

621 pine (*Pinus albicaulis* Engelm.) across fine spatial scales of the Lake Tahoe  
622 Basin, USA. *Molecular Ecology* **26**(12): 3168-3185.

623 **Liu X, Glémin S, Karrenberg S. 2020.** Evolution of putative barrier loci at an  
624 intermediate stage of speciation with gene flow in champions (*Silene*). *Molecular*  
625 *Ecology* **29**(18): 3511-3525.

626 **Liu X, Karrenberg S. 2018.** Genetic architecture of traits associated with reproductive  
627 barriers in *Silene*: Coupling, sex chromosomes and variation. *Molecular Ecology*  
628 **27**(19): 3889-3904.

629 **Lowry DB, Lovell JT, Zhang L, Bonnette J, Fay PA, Mitchell RB, Lloyd-Reilley J,**  
630 **Boe AR, Wu Y, Rouquette FM, Jr., et al. 2019.** QTL x environment  
631 interactions underlie adaptive divergence in switchgrass across a large latitudinal  
632 gradient. *Proceeding of the National Academy of Sciences, U S A* **116**(26):  
633 12933-12941.

634 **Mee JA, Yeaman S. 2019.** Unpacking conditional neutrality: genomic signatures of  
635 selection on conditionally beneficial and conditionally deleterious mutations.  
636 *American Naturalist* **194**(4): 529-540.

637 **Minder AM, Rothenbuehler C, Widmer A. 2007.** Genetic structure of hybrid zones  
638 between *Silene latifolia* and *Silene dioica* (Caryophyllaceae): evidence for  
639 introgressive hybridization. *Molecular Ecology* **16**(12): 2504-2516.

640 **Mitchell-Olds T, Willis JH, Goldstein DB. 2007.** Which evolutionary processes  
641 influence natural genetic variation for phenotypic traits? *Nature Reviews:*  
642 *Genetics* **8**(11): 845-856.

643 **Nosil P. 2012.** *Ecological Speciation*. Oxford: Oxford University Press.

644 **O'Leary SJ, Puritz JB, Willis SC, Hollenbeck CM, Portnoy DS. 2018.** These aren't  
645 the loci you're looking for: Principles of effective SNP filtering for molecular  
646 ecologists. *Molecular Ecology* **27**(16): 3193-3206.

647 **Orr HA. 1998.** The population genetics of adaptation: the distribution of factors fixed  
648 during adaptive evolution. *Evolution* **52**(4): 935-949.

649 **Orr HA. 2005.** The genetic theory of adaptation: a brief history. *Nature Reviews*  
650 *Genetics* **6**(2): 119-127.

651 **Peterson BK, Weber JN, Kay EH, Fisher HS, Hoekstra HE. 2012.** Double digest  
652 RADseq: an inexpensive method for de novo SNP discovery and genotyping in  
653 model and non-model species. *PloS One* **7**(5): e37135.

654 **Purcell S, Neale B, Todd-Brown K, Thomas L, Ferreira MAR, Bender D, Maller J,**  
655 **Sklar P, de Bakker PIW, Daly MJ, et al. 2007.** PLINK: a tool set for whole-  
656 genome association and population-based linkage analyses. *American Journal of*  
657 *Human Genetics* **81**(3): 559-575.

658 **Puritz JB, Hollenbeck CM, Gold JR. 2014.** dDocent: a RADseq, variant-calling  
659 pipeline designed for population genomics of non-model organisms. *PeerJ* **2**:  
660 e431.

661 **R Core Team. 2020.** R: A language and environment for statistical computing. R  
662 Foundation for Statistical Computing, Vienna, Austria. [https://www.R-](https://www.R-project.org/)  
663 [project.org/](https://www.R-project.org/).

664 **Rockman MV. 2012.** The QTN program and the alleles that matter for evolution: All  
665 that's gold does not glitter. *Evolution* **66**(1): 1-17.

666 **Savolainen O, Lascoux M, Merila J. 2013.** Ecological genomics of local adaptation.  
667 *Nature Reviews: Genetics* **14**(11): 807-820.

668 **Selby JP, Willis JH. 2018.** Major QTL controls adaptation to serpentine soils in  
669 *Mimulus guttatus*. *Molecular Ecology* **27**(24): 5073-5087.

670 **Tiffin P, Ross-Ibarra J. 2014.** Advances and limits of using population genetics to  
671 understand local adaptation. *Trends in Ecology and Evolution* **29**(12): 673-680.

672 **Tigano A, Friesen VL. 2016.** Genomics of local adaptation with gene flow. *Molecular*  
673 *Ecology* **25**(10): 2144-2164.

674 **Tusso S, Nieuwenhuis BPS, Weissensteiner B, Immler S, Wolf JBW. 2021.**  
675 Experimental evolution of adaptive divergence under varying degrees of gene  
676 flow. *Nature Ecology and Evolution* **5**(3): 338-349.

677 **Wadgymar SM, Lowry DB, Gould BA, Byron CN, Mactavish RM, Anderson JT.**  
678 **2017.** Identifying targets and agents of selection: innovative methods to evaluate  
679 the processes that contribute to local adaptation. *Methods in Ecology and*  
680 *Evolution* **8**(6): 738-749.

681 **Yeaman S. 2015.** Local adaptation by alleles of small effect. *The American Naturalist*  
682 **186**(S1): S74-S89.

683 **Yeaman S, Whitlock MC. 2011.** The genetic architecture of adaptation under  
684 migration-selection balance. *Evolution* **65**(7): 1897-1911.

685 **Zhou X, Carbonetto P, Stephens M. 2013.** Polygenic modeling with bayesian sparse  
686 linear mixed models. *Plos Genetics* **9**(2): e1003264.

687



## 688 **Supporting Information**

689

690 **Figure S1.** Principal components analysis including  $F_0$  and  $F_2$  generations.

691 **Figure S2.** Principal components analysis of  $F_2$  families.

692 **Figure S3.** Posterior distributions of hyperparameters, *S. dioica* habitat.

693 **Figure S4.** Posterior distributions of hyperparameters, *S. latifolia* habitat.

694 **Figure S5.** Model-averaged effect sizes ( $\bar{\beta}$ ) in the *S. dioica* habitat, plotted against  $\bar{\beta}$  in  
695 the *S. latifolia* habitat.

696 **Figure S6.** Permutation test comparing between-species allele frequency differences  
697 among positive- and negative-effect alleles, based on raw effect size estimates ( $\hat{\beta}$ ).

698 **Figure S7.** Permutation test comparing between-species allele frequency differences  
699 among positive- and negative-effect alleles, based on model-averaged effect size  
700 estimates ( $\bar{\beta}$ ).

701 **Figure S8.** Correlations among simulated effects and raw and model-averaged estimates  
702 of effect sizes ( $\hat{\beta}$  and  $\bar{\beta}$ ).

703

704 **Table S1.** Description of source populations and transplant sites.

705 **Table S2.** Crossing scheme.

706 **Table S3.** Individuals used for crosses.

707 **Table S4.** Sparse-effect loci with posterior inclusion probabilities over 0.01.

708

709

# 710 Table

711

712 **Table 1.** Genetic architecture of cumulative flowering, a fitness component, in  
713 recombinant F<sub>2</sub> hybrids between the champions *Silene dioica* and *S. latifolia* in a field  
714 transplant experiment at sites of each species; given are medians, means and 90 % equal  
715 tail credible intervals (90% cred. int.) of hyperparameters estimated in Bayesian Sparse  
716 Linear Mixed Models (BSLMMs): *PVE* (proportion variation explained, broad-sense  
717 heritability,  $H^2$ ), *PGE* (proportion variation explained by measurable effects),  $h^2$   
718 (narrow-sense heritability,  $PVE * PGE$ ) and  $n-\gamma$  (number of loci with measurable  
719 effects). Posterior distributions of hyperparameters are shown in Supplementary  
720 Figures S3 and S4.

|                                 | Hyperparameter |            |           |            |
|---------------------------------|----------------|------------|-----------|------------|
|                                 | <i>PVE</i>     | <i>PGE</i> | $h^2$     | $n-\gamma$ |
| <i>Silene dioica</i> habitat    |                |            |           |            |
| median                          | 0.117          | 0.411      | 0.037     | 11         |
| mean                            | 0.136          | 0.434      | 0.060     | 42.2       |
| 90% cred. int.                  | 0.017 - 0.321  | 0 - 0.945  | 0 - 0.198 | 0 - 205    |
| <i>Silene latifolia</i> habitat |                |            |           |            |
| median                          | 0.096          | 0.411      | 0.029     | 16         |
| mean                            | 0.124          | 0.431      | 0.054     | 51.4       |
| 90% cred. int.                  | 0.008 - 0.337  | 0 - 0.938  | 0 - 0.193 | 0 - 225    |

721

722

723

724 FIGURE 1  
725

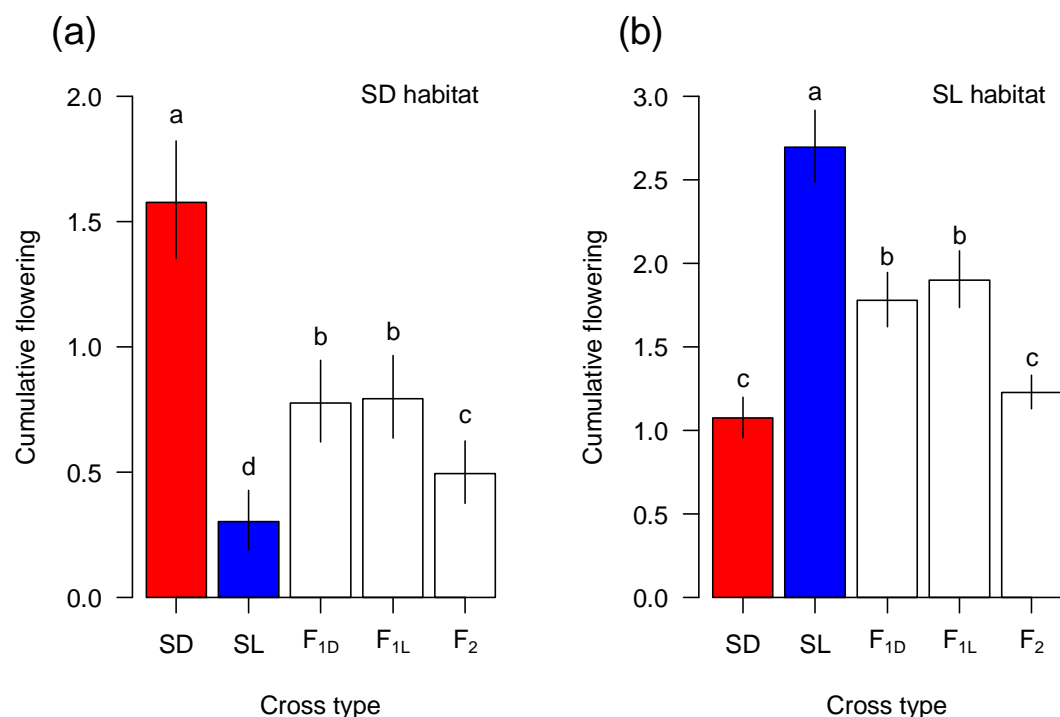

726  
727  
728 **Figure 1.** Habitat adaptation in campions (*Silene*): cumulative flowering (number of times  
729 flowered over four years, plus 1 if the plant survived to the end of the experiment), a fitness  
730 component, in crosses within each of two campion species, *Silene dioica* (SD) and *S. latifolia*  
731 (SL), as well as in their first-generation hybrids (F<sub>1D</sub> with SD mother, F<sub>1L</sub>, SL mother) and  
732 second-generation hybrids (F<sub>2</sub>) in the habitat of each species, (a) SD habitat and (b) SL habitat;  
733 least square means and 95% confidence intervals are given and different letters indicate  
734 significant differences between cross types within each habitat. This data is published in Favre  
735 et al. (2017 and re-analyzed here for illustration (see text).

736  
737

738 FIGURE 2  
739  
740

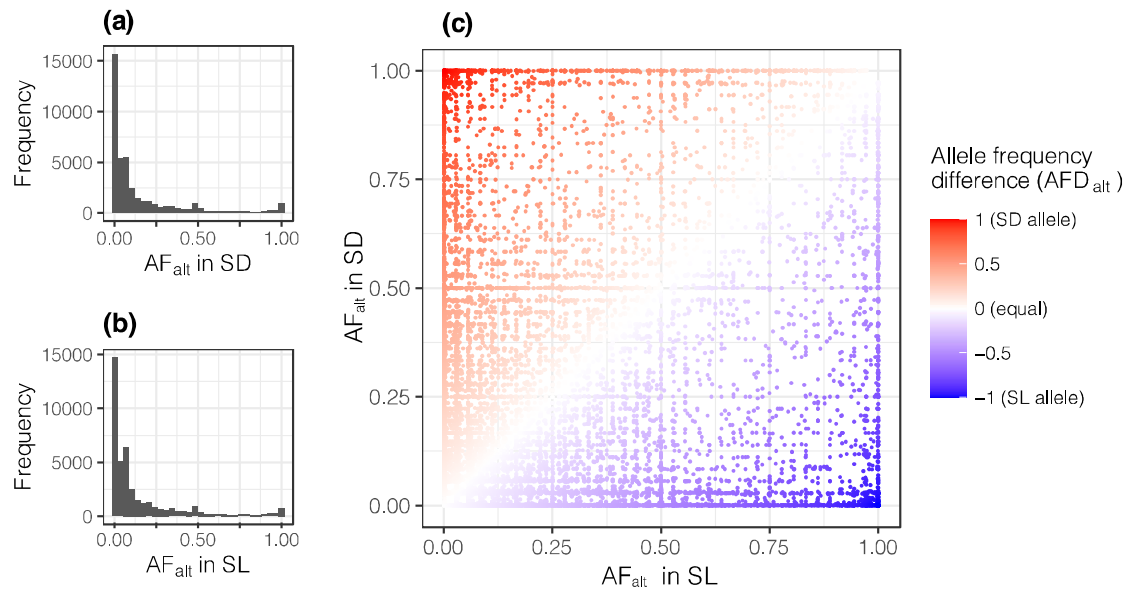

741  
742  
743  
744 **Figure 2.** Frequencies of the alternative allele (AF<sub>alt</sub>) in two campion species, *Silene dioica*  
745 (SD) and *S. latifolia* (SL) for 42'090 loci used in an association study: **(a)** distribution of alleles  
746 frequencies in SD, **(b)** distribution of allele frequencies in SL and **(c)** SD allele frequency  
747 (y-axis) against SL allele frequency (x-axis) with allele frequency differences (AFD<sub>alt</sub>) between  
748 the two species (SD - SL) indicated as a color gradient from red (allele fixed in SD and absent  
749 in SL) to white (equal frequency in both species) to blue (allele fixed in SL and absent in SD).  
750  
751

752 FIGURE 3

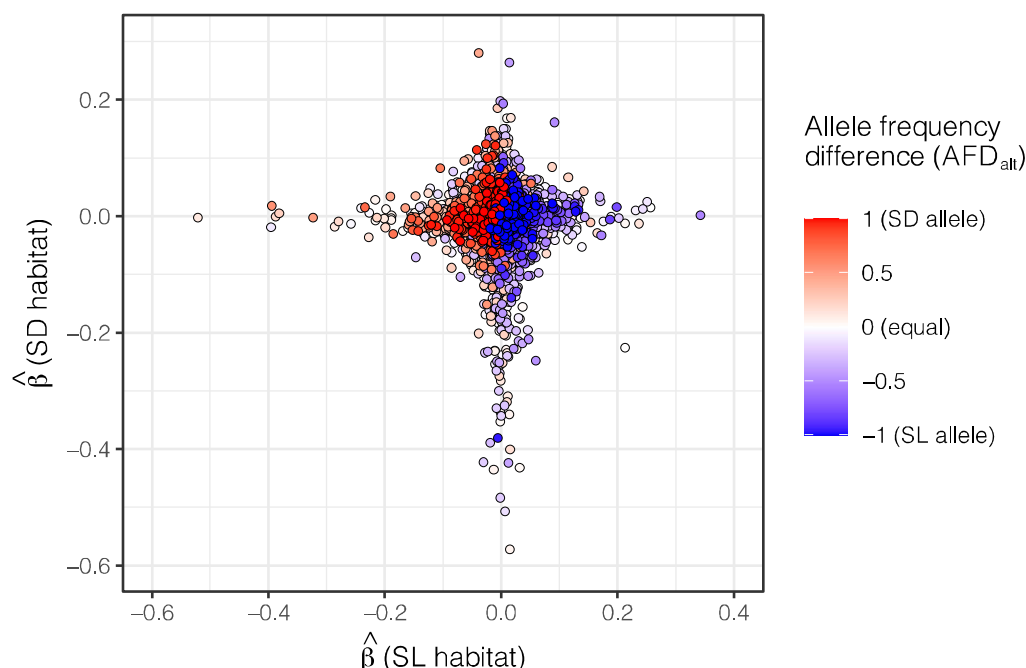

753  
754  
755 **Figure 3.** Locus-specific effect sizes of the alternative allele on cumulative flowering, a fitness  
756 component, measured in recombinant hybrids between two campion species, *Silene dioica* (SD)  
757 and *S. latifolia* (SL) that were transplanted into the habitat of each species (SD habitat, y-axis;  
758 SL habitat, x-axis). Given are raw effect estimates,  $\hat{\beta}$ , from Bayesian Sparse Linear Mixed  
759 Models (BSLMMs). Allele frequency differences for the alternative allele (AFD<sub>alt</sub>) between the  
760 two species (SD-SL) are indicated as a color gradient from blue (allele fixed in SL and absent in  
761 SD) to white (equal frequency in both species) to red (allele fixed in SD and absent in SL).  
762 Points are plotted in the order of increasing absolute AFD<sub>alt</sub>, such that highly differentiated loci  
763 are most visible. Loci with evidence for antagonistic pleiotropy would have  $\hat{\beta}$ -values of  
764 opposite signs in two habitats (top left, and bottom right), whereas loci consistent with  
765 conditional neutrality lie at zero on one axis, but deviate substantially from zero on the other.  
766

767  
768  
769  
770

FIGURE 4

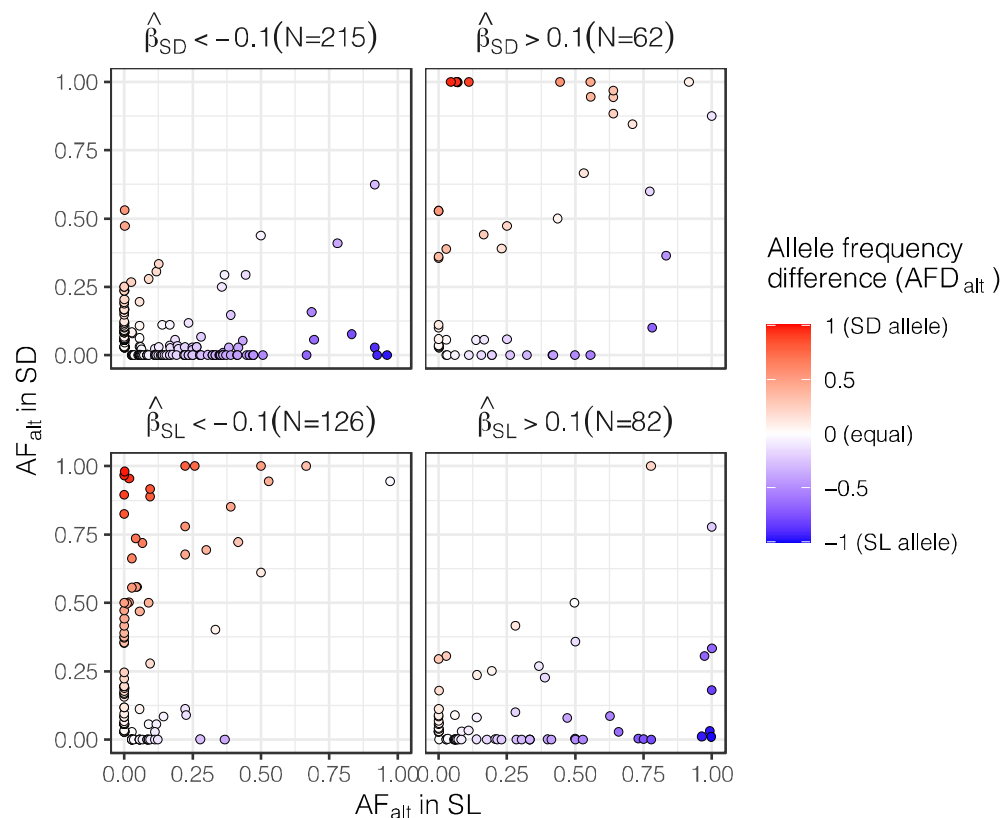

771  
772  
773  
774  
775  
776  
777  
778  
779  
780  
781  
782  
783  
784  
785

**Figure 4.** Frequencies of the alternative allele (AF<sub>alt</sub>) in two campion species, *Silene dioica* (SD, y-axis) and *S. latifolia* (SL, x-axis) for loci associated with cumulative flowering, a fitness component, in the habitat of each species. Shown are loci with absolute raw effect sizes,  $|\hat{\beta}|$ , over 0.1 (in standard deviation units) in Bayesian Sparse Linear Mixed Models (BSLMMs) with the number of loci (N):  $\hat{\beta} < -0.1$  in the SD habitat (negative selection),  $\hat{\beta} > 0.1$  in the SD habitat (positive selection),  $\hat{\beta} < -0.1$  in the SL habitat (negative selection), and  $\hat{\beta} > 0.1$  in the SL habitat (positive selection). Allele frequency differences for the alternative allele (AFD<sub>alt</sub>) between the two species (SD-SL) are indicated as a color gradient from blue (allele fixed in SL and absent in SD) to white (equal frequency in both species) to red (allele fixed in SD and absent in SL). Positive selection is associated with native alleles, whereas alleles under negative selection are more common in the non-native species (see also text and Supporting Information Figs. S6 and S7).

786 FIGURE 5

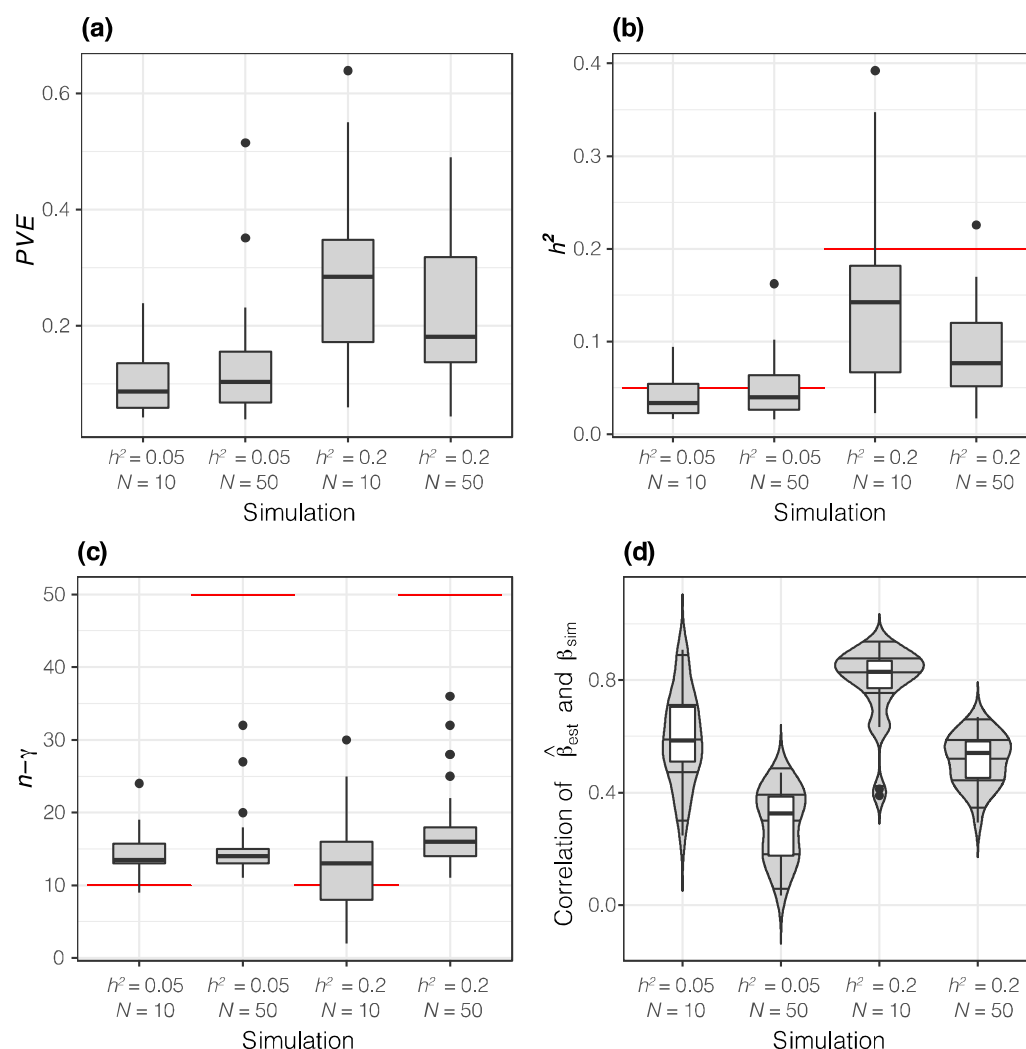

787  
788

789 **Figure 5.** Performance analysis of Bayesian Sparse Linear Mixed Models (BSLMM) on  
790 simulated data based on a dataset from champions (*Silene*, 150 individuals, 42'090 loci).  
791 Simulated phenotypes had narrow-sense heritabilities ( $h^2$ ) of 0.05 or 0.20 with 10 or 50  
792 functional loci ( $N$ ); 30 replicate simulations per scenario were used and boxplots or  
793 violin plots summarize variation in medians of posterior distributions of  
794 hyperparameters among simulation replicates as well as of correlations of simulated and  
795 estimated per-locus effect sizes. **(a)** percent variation explained ( $PVE$ , interpreted as  
796 broad-sense heritability,  $H^2$ ), **(b)** narrow-sense heritability  $h^2$  (as  $PVE * PGE$  [ $PGE$ ,  
797 proportion of sparse effects in  $PVE$ ]), **(c)** number of sparse-effect loci ( $n-\gamma$ ) and **(d)**,  
798 correlation of raw estimated effect sizes for individual loci  $\hat{\beta}_{est}$  with simulated effect  
799 sizes  $\beta_{sim}$ . On **(b)** and **(c)** simulated values are indicated with red lines.
